# Supplementary material
Source: PubMed Central journal article supplement (PMC8297670)
Supplement: BLT-19-317_Online_Supplementary_Content.pdf [file BLT-19-317_Online_Supplementary_Content.pdf]

**ONLINE SUPPLEMENTARY CONTENT**

**Table S1 - Newcastle - Ottawa Quality Assessment Scale: cohort studies. Outcome prevalence of ABO group among Covid-19 infected and uninfected subjects**

| Cohort studies                                                                                                                   | Study reference      |                       |                    |                    |                   |                     |                       |
|----------------------------------------------------------------------------------------------------------------------------------|----------------------|-----------------------|--------------------|--------------------|-------------------|---------------------|-----------------------|
|                                                                                                                                  | Boudin <sup>24</sup> | Gallian <sup>28</sup> | Latz <sup>30</sup> | Levi <sup>37</sup> | Ray <sup>38</sup> | Zietz <sup>39</sup> | Barnkob <sup>42</sup> |
| <b>SELECTION</b>                                                                                                                 |                      |                       |                    |                    |                   |                     |                       |
| <b>1) Representativeness of the exposed cohort (patients who developed covid-19 infection)</b>                                   |                      |                       |                    |                    |                   |                     |                       |
| a) truly representative of covid-19 pts in the community*                                                                        |                      | x                     |                    | x                  | x                 | x                   | x                     |
| b) somewhat representative of covid-19 pts in the community*                                                                     | x                    |                       | x                  |                    |                   |                     |                       |
| c) selected group of subjects                                                                                                    |                      |                       |                    |                    |                   |                     |                       |
| d) no description of the derivation of the cohort                                                                                |                      |                       |                    |                    |                   |                     |                       |
| <b>2) Selection of the non exposed cohort (patients who did not develop covid-19 infection)</b>                                  |                      |                       |                    |                    |                   |                     |                       |
| a) drawn from the same community as the exposed cohort*                                                                          | x                    | x                     | x                  | x                  | x                 | x                   | x                     |
| b) drawn from a different source                                                                                                 |                      |                       |                    |                    |                   |                     |                       |
| c) no description of the derivation of the non exposed cohort                                                                    |                      |                       |                    |                    |                   |                     |                       |
| <b>3) Ascertainment of exposure</b>                                                                                              |                      |                       |                    |                    |                   |                     |                       |
| a) ) secure record*                                                                                                              | x                    | x                     | x                  | x                  | x                 | x                   | x                     |
| b) structured interview*                                                                                                         |                      |                       |                    |                    |                   |                     |                       |
| c) written self report                                                                                                           |                      |                       |                    |                    |                   |                     |                       |
| d) no description                                                                                                                |                      |                       |                    |                    |                   |                     |                       |
| <b>4) Demonstration that outcome of interest was not present at start of study</b>                                               |                      |                       |                    |                    |                   |                     |                       |
| a) yes*                                                                                                                          | x                    | x                     | x                  | x                  | x                 | x                   | x                     |
| b) no                                                                                                                            |                      |                       |                    |                    |                   |                     |                       |
| <b>COMPARABILITY</b>                                                                                                             |                      |                       |                    |                    |                   |                     |                       |
| <b>1) Comparability of cohorts on the basis of the design or analysis</b>                                                        |                      |                       |                    |                    |                   |                     |                       |
| a) study controls for ABO groups determination*                                                                                  | x                    | x                     | x                  | x                  | x                 | x                   | x                     |
| b) study controls for additional confounding (e.g.,using multivariate analysis or logistic regression)*                          | x                    | x                     | x                  |                    | x                 | x                   |                       |
| <b>OUTCOME</b>                                                                                                                   |                      |                       |                    |                    |                   |                     |                       |
| <b>1) Assessment of outcome</b>                                                                                                  |                      |                       |                    |                    |                   |                     |                       |
| a)independent blind assessment*                                                                                                  |                      |                       |                    |                    |                   |                     |                       |
| b) record linkage*                                                                                                               | x                    | x                     | x                  | x                  | x                 | x                   | x                     |
| c) self report                                                                                                                   |                      |                       |                    |                    |                   |                     |                       |
| d) no description                                                                                                                |                      |                       |                    |                    |                   |                     |                       |
| <b>2) Was follow-up long enough for outcomes to occur</b>                                                                        |                      |                       |                    |                    |                   |                     |                       |
| a) yes*                                                                                                                          | x                    | x                     | x                  | x                  | x                 | x                   | x                     |
| b) no                                                                                                                            |                      |                       |                    |                    |                   |                     |                       |
| <b>3. Adequacy of follow up of cohorts</b>                                                                                       |                      |                       |                    |                    |                   |                     |                       |
| a) complete follow up - all subjects accounted for*                                                                              |                      | x                     | x                  | x                  | x                 | x                   | x                     |
| b) subjects lost to follow up unlikely to introduce bias - small number lost - follow up, or description provided of those lost* | x                    |                       |                    |                    |                   |                     |                       |
| c) low follow up rate and no description of those lost                                                                           |                      |                       |                    |                    |                   |                     |                       |
| d) no statement                                                                                                                  |                      |                       |                    |                    |                   |                     |                       |
| <b>TOTAL STARS</b>                                                                                                               | <b>9</b>             | <b>8</b>              | <b>7</b>           | <b>8</b>           | <b>8</b>          | <b>9</b>            | <b>8</b>              |

Table SII - Newcastle - Ottawa Quality Assessment Scale: outcomes prevalence ABO group among Covid-19 infected and uninfected patients

| Case control studies                                                                                              | Study reference          |                         |                    |                   |                         |                     |                    |                  |                  |                    |                         |
|-------------------------------------------------------------------------------------------------------------------|--------------------------|-------------------------|--------------------|-------------------|-------------------------|---------------------|--------------------|------------------|------------------|--------------------|-------------------------|
|                                                                                                                   | Ellinghaus <sup>22</sup> | Abdollahi <sup>23</sup> | Dzik <sup>25</sup> | Fan <sup>16</sup> | Franchini <sup>27</sup> | Goker <sup>29</sup> | Leaf <sup>31</sup> | Li <sup>32</sup> | Wu <sup>33</sup> | Zhao <sup>36</sup> | Mufiz-Diaz <sup>1</sup> |
| <b>SELECTION</b>                                                                                                  |                          |                         |                    |                   |                         |                     |                    |                  |                  |                    |                         |
| <b>1) Is the case definition adequate?</b>                                                                        |                          |                         |                    |                   |                         |                     |                    |                  |                  |                    |                         |
| a) yes, with independent validation*                                                                              | x                        | x                       | x                  |                   |                         | x                   | x                  | x                | x                | x                  | x                       |
| b) yes, eg record linkage or based on self report                                                                 |                          |                         |                    | x                 | x                       |                     |                    |                  |                  |                    |                         |
| <b>2) Representativeness of the cases</b>                                                                         |                          |                         |                    |                   |                         |                     |                    |                  |                  |                    |                         |
| a) consecutive or obviously representative series of cases*                                                       | x                        |                         | x                  |                   |                         |                     | x                  |                  |                  |                    |                         |
| b) potential for selection biases or not stated                                                                   |                          | x                       |                    | x                 | x                       | x                   |                    | x                | x                | x                  | x                       |
| <b>3) Selection of controls</b>                                                                                   |                          |                         |                    |                   |                         |                     |                    |                  |                  |                    |                         |
| a) drawn from the same population as exposed cohort*                                                              | x                        |                         | x                  |                   | x                       | x                   |                    |                  |                  | x                  | x                       |
| b) drawn from different source                                                                                    |                          | x                       |                    | x                 |                         |                     | x                  | x                | x                |                    |                         |
| c) no description                                                                                                 |                          |                         |                    |                   |                         |                     |                    |                  |                  |                    |                         |
| <b>4) Definition of controls</b>                                                                                  |                          |                         |                    |                   |                         |                     |                    |                  |                  |                    |                         |
| a) no history of disease (endpoint)*                                                                              | x                        | x                       | x                  | x                 | x                       | x                   | x                  | x                | x                | x                  | x                       |
| b) no description of source                                                                                       |                          |                         |                    |                   |                         |                     |                    |                  |                  |                    |                         |
| <b>COMPARABILITY</b>                                                                                              |                          |                         |                    |                   |                         |                     |                    |                  |                  |                    |                         |
| <b>1) Comparability of cases and controls on the basis of the design or analysis</b>                              |                          |                         |                    |                   |                         |                     |                    |                  |                  |                    |                         |
| a) study controls for covid-19 development*                                                                       | x                        | x                       | x                  | x                 | x                       | x                   | x                  | x                | x                | x                  | x                       |
| b) study controls for any additional confounding factor (eg., with multivariate analysis or logistic regression)* | x                        | x                       |                    |                   |                         |                     |                    |                  |                  |                    |                         |
| <b>EXPOSURE</b>                                                                                                   |                          |                         |                    |                   |                         |                     |                    |                  |                  |                    |                         |
| <b>1) Ascertainment of exposure</b>                                                                               |                          |                         |                    |                   |                         |                     |                    |                  |                  |                    |                         |
| a) secure record*                                                                                                 | x                        | x                       | x                  | x                 | x                       | x                   | x                  | x                | x                | x                  | x                       |
| b) structured interview where blind to case/control status*                                                       |                          |                         |                    |                   |                         |                     |                    |                  |                  |                    |                         |
| c) interview not blinded to case/control status                                                                   |                          |                         |                    |                   |                         |                     |                    |                  |                  |                    |                         |
| d) written self report or medical record only                                                                     |                          |                         |                    |                   |                         |                     |                    |                  |                  |                    |                         |
| e) no description                                                                                                 |                          |                         |                    |                   |                         |                     |                    |                  |                  |                    |                         |
| <b>2) Same methods of ascertainment for cases and controls</b>                                                    |                          |                         |                    |                   |                         |                     |                    |                  |                  |                    |                         |
| a) yes*                                                                                                           | x                        |                         |                    |                   |                         |                     |                    | x                | x                |                    |                         |
| b) no                                                                                                             |                          | x                       | x                  | x                 | x                       | x                   | x                  |                  |                  | x                  | x                       |
| <b>3) Non-response rate</b>                                                                                       |                          |                         |                    |                   |                         |                     |                    |                  |                  |                    |                         |
| a) same rate for all groups*                                                                                      | x                        | x                       | x                  | x                 | x                       | x                   | x                  | x                | x                | x                  | x                       |
| b) non respondents described                                                                                      |                          |                         |                    |                   |                         |                     |                    |                  |                  |                    |                         |
| c) rate different and no designation                                                                              |                          |                         |                    |                   |                         |                     |                    |                  |                  |                    |                         |
| <b>TOTAL STARS</b>                                                                                                | <b>9</b>                 | <b>6</b>                | <b>7</b>           | <b>5</b>          | <b>6</b>                | <b>6</b>            | <b>5</b>           | <b>6</b>         | <b>6</b>         | <b>7</b>           | <b>6</b>                |

**Table SIII - Newcastle-Ottawa Quality Assessment Scale: cohort studies evaluating severity of Covid-19 infections according to ABO group**

| Case control studies                                                                                                             | Study reference          |                         |                      |                    |                       |                    |                    |                       |                   |                     |                   |                       |
|----------------------------------------------------------------------------------------------------------------------------------|--------------------------|-------------------------|----------------------|--------------------|-----------------------|--------------------|--------------------|-----------------------|-------------------|---------------------|-------------------|-----------------------|
|                                                                                                                                  | Ellinghaus <sup>22</sup> | Abdollahi <sup>23</sup> | Boudin <sup>24</sup> | Dzik <sup>25</sup> | Gallian <sup>28</sup> | Latz <sup>30</sup> | Leaf <sup>31</sup> | Yaylaci <sup>34</sup> | Ray <sup>38</sup> | Zietz <sup>39</sup> | May <sup>40</sup> | Barnkob <sup>42</sup> |
| <b>SELECTION</b>                                                                                                                 |                          |                         |                      |                    |                       |                    |                    |                       |                   |                     |                   |                       |
| <b>1) Representativeness cohort of patients who developed severe Covid-19 infection</b>                                          |                          |                         |                      |                    |                       |                    |                    |                       |                   |                     |                   |                       |
| a) truly representative of covid-19 pts in the community*                                                                        | x                        | x                       |                      | x                  | x                     |                    | x                  | x                     | x                 | x                   | x                 | x                     |
| b) somewhat representative of Covid-19 pts in the community*                                                                     |                          |                         | x                    |                    |                       | x                  |                    |                       |                   |                     |                   |                       |
| c) selected group of subjects                                                                                                    |                          |                         |                      |                    |                       |                    |                    |                       |                   |                     |                   |                       |
| d) no description of the derivation of the cohort                                                                                |                          |                         |                      |                    |                       |                    |                    |                       |                   |                     |                   |                       |
| <b>2) Selection of the cohort of patients who did not develop severe Covid-19 infection</b>                                      |                          |                         |                      |                    |                       |                    |                    |                       |                   |                     |                   |                       |
| a) drawn from the same community as the exposed cohort*                                                                          | x                        | x                       | x                    | x                  | x                     | x                  | x                  | x                     | x                 | x                   | x                 | x                     |
| b) drawn from a different source                                                                                                 |                          |                         |                      |                    |                       |                    |                    |                       |                   |                     |                   |                       |
| c) no description of the derivation of the non exposed cohort                                                                    |                          |                         |                      |                    |                       |                    |                    |                       |                   |                     |                   |                       |
| <b>3) Ascertainment of exposure</b>                                                                                              |                          |                         |                      |                    |                       |                    |                    |                       |                   |                     |                   |                       |
| a) ) secure record*                                                                                                              | x                        | x                       | x                    | x                  | x                     | x                  | x                  | x                     | x                 | x                   | x                 | x                     |
| b) structured interview*                                                                                                         |                          |                         |                      |                    |                       |                    |                    |                       |                   |                     |                   |                       |
| c) written self report                                                                                                           |                          |                         |                      |                    |                       |                    |                    |                       |                   |                     |                   |                       |
| d) no description                                                                                                                |                          |                         |                      |                    |                       |                    |                    |                       |                   |                     |                   |                       |
| <b>4) Demonstration that outcome of interest was not present at start of study</b>                                               |                          |                         |                      |                    |                       |                    |                    |                       |                   |                     |                   |                       |
| a) yes*                                                                                                                          | x                        | x                       | x                    | x                  | x                     | x                  | x                  | x                     | x                 | x                   | x                 | x                     |
| b) no                                                                                                                            |                          |                         |                      |                    |                       |                    |                    |                       |                   |                     |                   |                       |
| <b>COMPARABILITY</b>                                                                                                             |                          |                         |                      |                    |                       |                    |                    |                       |                   |                     |                   |                       |
| <b>1) Comparability of cohorts on the basis of the design or analysis</b>                                                        |                          |                         |                      |                    |                       |                    |                    |                       |                   |                     |                   |                       |
| a) study controls for ABO groups determination*                                                                                  | x                        | x                       | x                    | x                  | x                     | x                  | x                  | x                     | x                 | x                   | x                 | x                     |
| b) study controls for additional confounding (e.g.,using multivariate analysis or logistic regression)*                          | x                        | x                       |                      |                    | x                     | x                  |                    | x                     | x                 | x                   |                   |                       |
| <b>OUTCOME</b>                                                                                                                   |                          |                         |                      |                    |                       |                    |                    |                       |                   |                     |                   |                       |
| <b>1) Assessment of outcome</b>                                                                                                  |                          |                         |                      |                    |                       |                    |                    |                       |                   |                     |                   |                       |
| a)independent blind assessment*                                                                                                  | x                        | x                       |                      |                    |                       |                    |                    |                       |                   |                     |                   |                       |
| b) record linkage*                                                                                                               |                          |                         | x                    | x                  | x                     | x                  | x                  | x                     | x                 | x                   | x                 | x                     |
| c) self report                                                                                                                   |                          |                         |                      |                    |                       |                    |                    |                       |                   |                     |                   |                       |
| d) no description                                                                                                                |                          |                         |                      |                    |                       |                    |                    |                       |                   |                     |                   |                       |
| <b>2) Was follow-up long enough for outcomes to occur</b>                                                                        |                          |                         |                      |                    |                       |                    |                    |                       |                   |                     |                   |                       |
| a) yes*                                                                                                                          | x                        | x                       | x                    | x                  | x                     | x                  | x                  | x                     | x                 | x                   | x                 | x                     |
| b) no                                                                                                                            |                          |                         |                      |                    |                       |                    |                    |                       |                   |                     |                   |                       |
| <b>3) Adequacy of follow up of cohorts</b>                                                                                       |                          |                         |                      |                    |                       |                    |                    |                       |                   |                     |                   |                       |
| a) complete follow up - all subjects accounted for*                                                                              | x                        | x                       |                      | x                  | x                     | x                  |                    | x                     | x                 | x                   | x                 | x                     |
| b) subjects lost to follow up unlikely to introduce bias - small number lost - follow up, or description provided of those lost* |                          |                         | x                    |                    |                       | x                  |                    |                       |                   |                     |                   |                       |
| c) low follow up rate and no description of those lost                                                                           |                          |                         |                      |                    |                       |                    |                    |                       |                   |                     |                   |                       |
| d) no statement                                                                                                                  |                          |                         |                      |                    |                       |                    |                    |                       |                   |                     |                   |                       |
| <b>TOTAL STARS</b>                                                                                                               | <b>9</b>                 | <b>9</b>                | <b>9</b>             | <b>8</b>           | <b>8</b>              | <b>7</b>           | <b>8</b>           | <b>7</b>              | <b>8</b>          | <b>9</b>            | <b>8</b>          | <b>8</b>              |

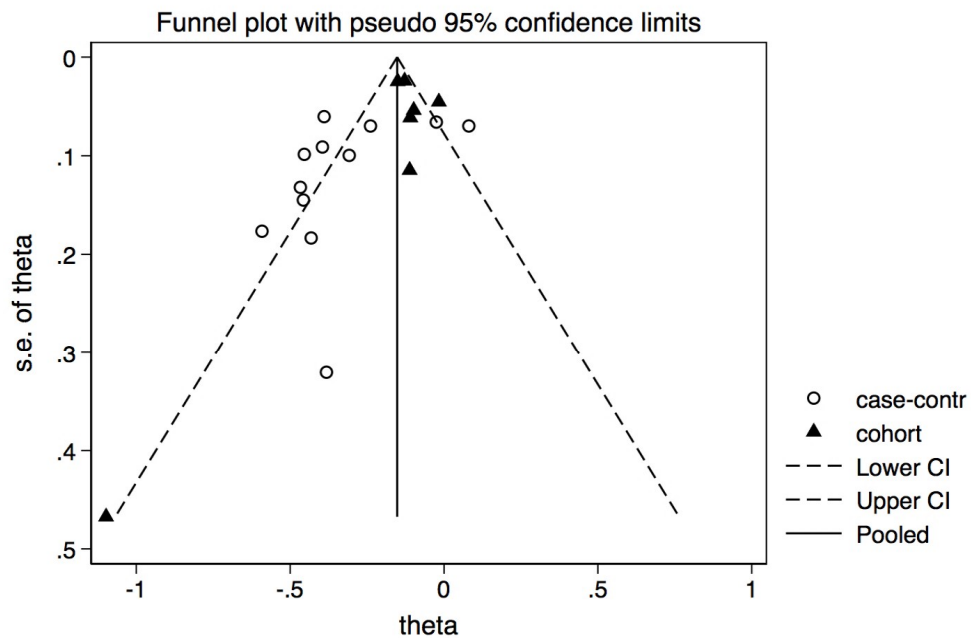

Figure S1 - Funnel plot of comparison. Outcome: prevalence of ABO group in SARS-CoV-2 infected and uninfected individuals

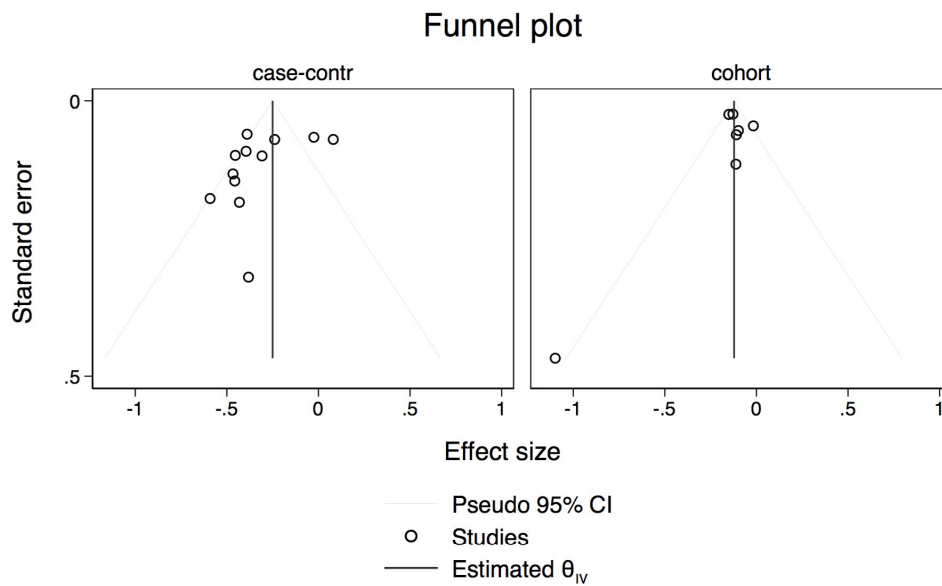

Graphs by design

Figure S2 - Funnel plot of comparison. Outcome: prevalence of ABO group in SARS-CoV-2 infected and uninfected individuals. The funnel plots are presented according to the study design
